# Supplementary material
Source: publisher figshare collection journal article supplement (https://acs.figshare.com/ndownloader/files/4173850)

Supporting Information for:

**Addition of aluminum and gallium species to aromatic and alkyl-substituted 1,4-diaza-1,3-butadiene ligands**

Ana M. Felix,<sup>†</sup> Diane A. Dickie,<sup>†</sup> Ian S. Horne,<sup>†</sup> Giang Page,<sup>†</sup> and Richard A. Kemp<sup>†,§,\*</sup>

<sup>†</sup>*Department of Chemistry and Chemical Biology, University of New Mexico, Albuquerque, NM, 87131-2609 USA*

<sup>§</sup>*Advanced Materials Laboratory, Sandia National Laboratories, Albuquerque, NM 87106 USA*

**Figures S1 – S8: Thermal ellipsoid plots of structures discussed in text**

**Figure S1.** Structure of **4**. Thermal ellipsoids are shown at 50% probability. For clarity, hydrogen atoms have been omitted.

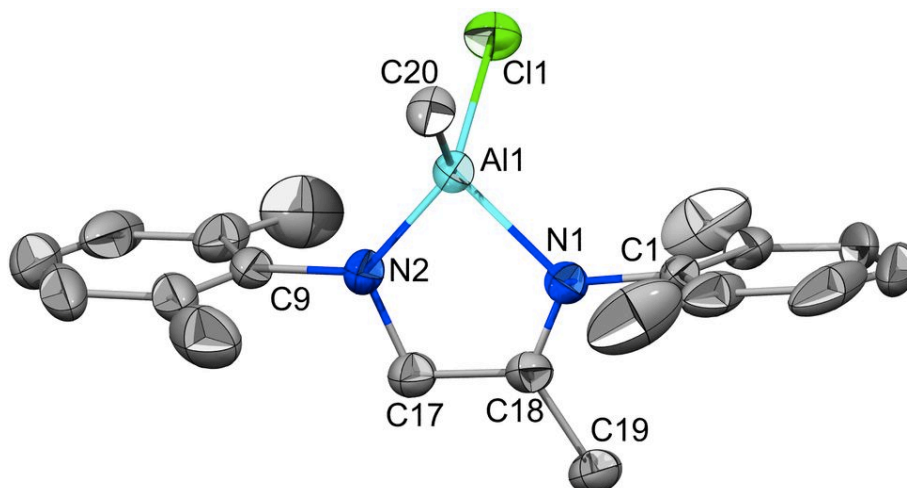

**Figure S2.** Structure of **5**. Thermal ellipsoids are shown at 50% probability. For clarity, hydrogen atoms have been omitted.

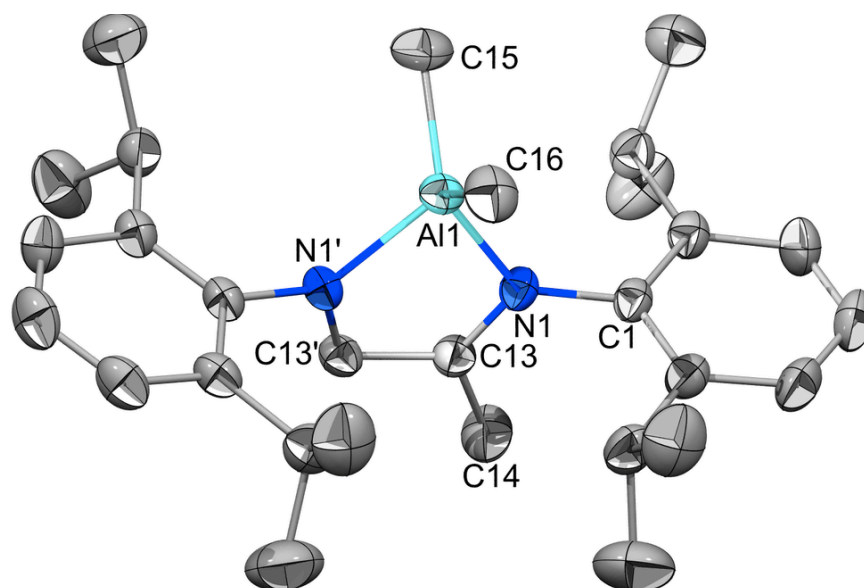

**Figure S3.** Structure of **9**. Thermal ellipsoids are shown at 50% probability. For clarity, hydrogen atoms have been omitted.

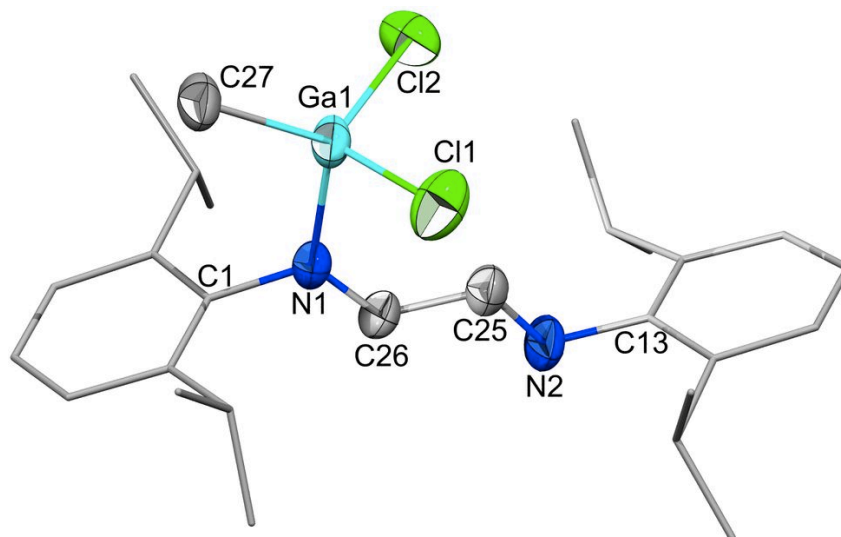

**Figure S4.** Structure of **11**. Thermal ellipsoids are shown at 50% probability. For clarity, hydrogen atoms have been omitted.

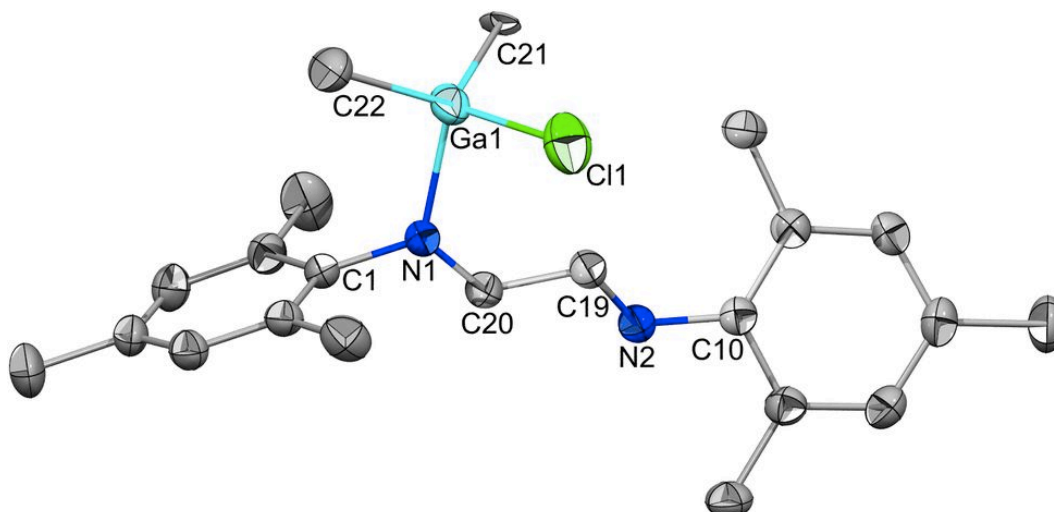

**Figure S5.** Structure of **12**. Thermal ellipsoids are shown at 50% probability. For clarity, hydrogen atoms have been omitted.

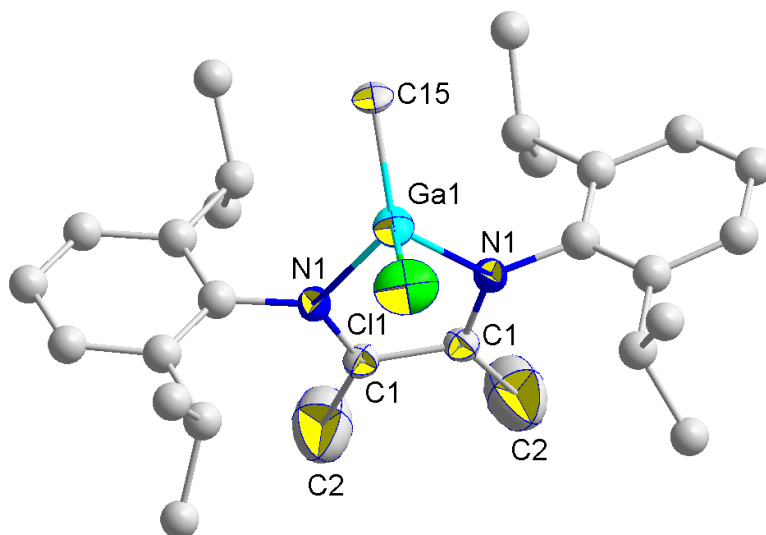

**Figure S6.** Structure of **13**. Thermal ellipsoids are shown at 50% probability. For clarity, hydrogen atoms have been omitted.

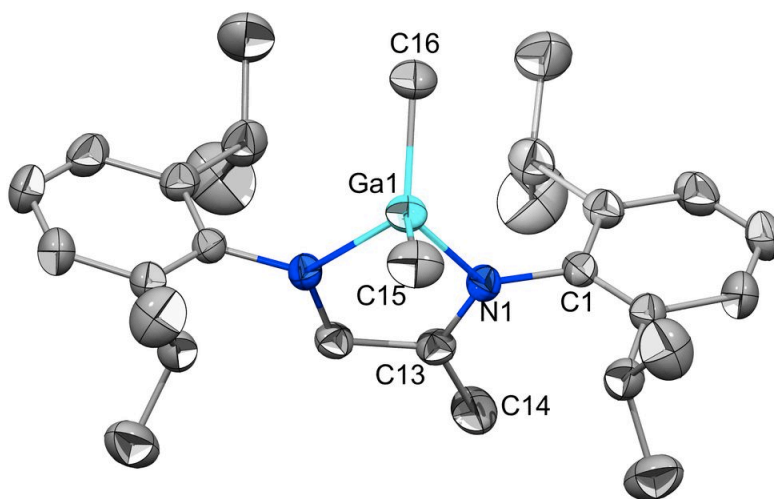

**Figure S7.** Structure of **14**. Thermal ellipsoids are shown at 50% probability. For clarity, hydrogen atoms have been omitted.

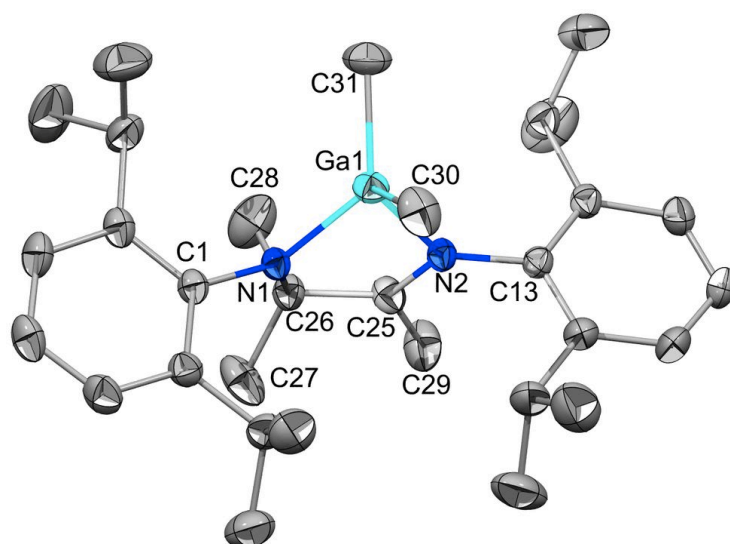

**Figure S8.** Structure of **16**. Thermal ellipsoids are shown at 50% probability. For clarity, hydrogen atoms have been omitted.

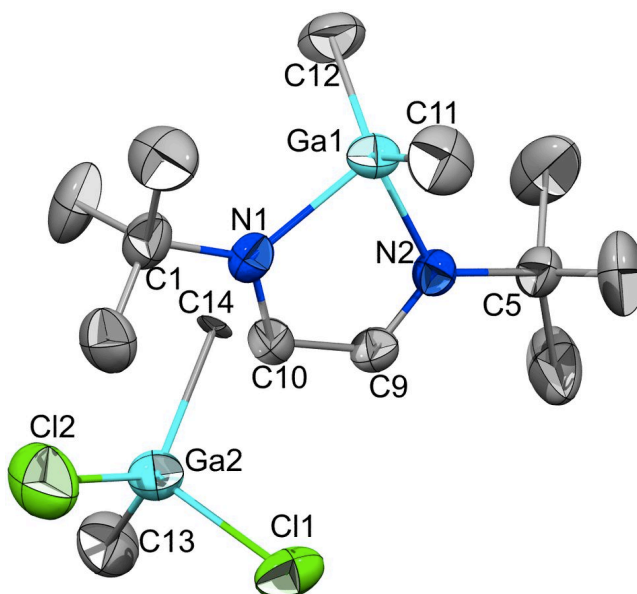

Supplement: Supplementary file 1 [file 4173850]
